# Supplementary material for: Validation of a delirium predictive model in patients admitted to surgical intensive care units: a multicentre prospective observational cohort study
Source: HighWire-hosted journal article supplement (doi:10.1136/bmjopen-2021-057890), 2022-06-01
Supplement: bmjopen-2021-057890supp002_data_supplement.pdf [file bmjopen-2021-057890supp002_data_supplement.pdf]

## Supplemental file

### S2. Modified Informant Questionnaire on Cognitive Decline in the Elderly (IQCODE) tool

#### English version

| Items                                                                                                                        | Comparing the elder's change with the previous 10 years |               |                 |             |            |
|------------------------------------------------------------------------------------------------------------------------------|---------------------------------------------------------|---------------|-----------------|-------------|------------|
|                                                                                                                              | 1                                                       | 2             | 3               | 4           | 5          |
|                                                                                                                              | Much improve                                            | A bit improve | Not much change | A bit worse | Much worse |
| 1. Recognizing the faces of family and friends                                                                               |                                                         |               |                 |             |            |
| 2. Remembering the names of family and friends                                                                               |                                                         |               |                 |             |            |
| 3. Remembering things about family and friends eg, occupations, birthdays, addresses                                         |                                                         |               |                 |             |            |
| 4. Remembering things that have happened recently                                                                            |                                                         |               |                 |             |            |
| 5. Recall conversations a few day later                                                                                      |                                                         |               |                 |             |            |
| 6. Forgetting what he/she want to say in the middle of a conversation                                                        |                                                         |               |                 |             |            |
| 7. Remembering his/her address and telephone number                                                                          |                                                         |               |                 |             |            |
| 8. Remembering what day and month it is                                                                                      |                                                         |               |                 |             |            |
| 9. Remembering where things are usually kept                                                                                 |                                                         |               |                 |             |            |
| 10. Remembering where to find things which have been put in a different place from usual                                     |                                                         |               |                 |             |            |
| 11. Remembering things that happened to him/her when he/she was young                                                        |                                                         |               |                 |             |            |
| 12. Remembering things he/she learned when he/she was young                                                                  |                                                         |               |                 |             |            |
| 13. Knowing about important historical events of the past                                                                    |                                                         |               |                 |             |            |
| 14. Adjusting to any change in his/her day-to-day                                                                            |                                                         |               |                 |             |            |
| 15. Knowing how to work familiar machines around the house                                                                   |                                                         |               |                 |             |            |
| 16. Learning to use a new gadget or machines around the house                                                                |                                                         |               |                 |             |            |
| 17. Learning the new things that in general                                                                                  |                                                         |               |                 |             |            |
| 18. Understanding the meaning of unusual words                                                                               |                                                         |               |                 |             |            |
| 19. Understanding magazine or newspaper articles                                                                             |                                                         |               |                 |             |            |
| 20. Following a story in a book or on TV                                                                                     |                                                         |               |                 |             |            |
| 21. Contacting with friends or for business purposes                                                                         |                                                         |               |                 |             |            |
| 22. Making decisions on everyday matters                                                                                     |                                                         |               |                 |             |            |
| 23. Handing money for shopping                                                                                               |                                                         |               |                 |             |            |
| 24. Handing financial matters                                                                                                |                                                         |               |                 |             |            |
| 25. Handing other everyday arithmetic problems, eg knowing how much food to buy, knowing a period of time for doing activity |                                                         |               |                 |             |            |
| 26. Using his/her intelligence to understand what's going on and to reason things through                                    |                                                         |               |                 |             |            |
| 27. Able to sing or pray the used one                                                                                        |                                                         |               |                 |             |            |
| 28. Selecting appropriate instrument                                                                                         |                                                         |               |                 |             |            |
| 29. Keep speak repeating                                                                                                     |                                                         |               |                 |             |            |
| 30. Carrying out daily activities                                                                                            |                                                         |               |                 |             |            |
| 31. Traveling to familiar place                                                                                              |                                                         |               |                 |             |            |
| 32. Working ability                                                                                                          |                                                         |               |                 |             |            |

**Thai Version**

|                                                                                                                                          | การเปลี่ยนแปลงระหว่าง 10 ปีที่แล้วกับปัจจุบัน |                     |                     |                    |               |
|------------------------------------------------------------------------------------------------------------------------------------------|-----------------------------------------------|---------------------|---------------------|--------------------|---------------|
|                                                                                                                                          | 1<br>ดีขึ้นมาก                                | 2<br>ดีขึ้นเล็กน้อย | 3<br>ไม่เปลี่ยนแปลง | 4<br>แย่ลงเล็กน้อย | 5<br>แย่ลงมาก |
| 1. ความจำเกี่ยวกับหน้าตาคนในครอบครัวหรือญาติ                                                                                             |                                               |                     |                     |                    |               |
| 2. ความจำเกี่ยวกับชื่อคนในครอบครัวหรือญาติ                                                                                               |                                               |                     |                     |                    |               |
| 3. ความจำในรายละเอียดของคนในครอบครัวหรือญาติเกี่ยวกับอาชีพที่อยู่                                                                        |                                               |                     |                     |                    |               |
| 4. ความจำในเหตุการณ์ที่เกิดขึ้นเมื่อ 2-3 วันที่ผ่านมา                                                                                    |                                               |                     |                     |                    |               |
| 5. ความจำในเรื่องที่สนทนาไปเมื่อ 2-3 วันที่ผ่านมา                                                                                        |                                               |                     |                     |                    |               |
| 6. พุคคลยอย่างต่อเนื่องโดยไม่ลืมสิ่งที่จะพูด                                                                                             |                                               |                     |                     |                    |               |
| 7. จำได้ว่าตอนนี้พักอาศัยอยู่ที่ไหน                                                                                                      |                                               |                     |                     |                    |               |
| 8. จำได้ว่าวันนี้เป็น วัน เดือน อะไร                                                                                                     |                                               |                     |                     |                    |               |
| 9. ความจำเกี่ยวกับที่ประจำที่ใช้เก็บของในบ้าน                                                                                            |                                               |                     |                     |                    |               |
| 10. จำได้ว่าวางของไว้ที่ไหน                                                                                                              |                                               |                     |                     |                    |               |
| 11. จำเหตุการณ์เกี่ยวกับคนในวัยเด็ก                                                                                                      |                                               |                     |                     |                    |               |
| 12. จำสิ่งที่คนได้เรียนรู้ในวัยเด็ก                                                                                                      |                                               |                     |                     |                    |               |
| 13. ทราบเหตุการณ์ที่สำคัญในอดีต                                                                                                          |                                               |                     |                     |                    |               |
| 14. ความสามารถในการปรับตัวเข้ากับการเปลี่ยนแปลงในชีวิตประจำวัน                                                                           |                                               |                     |                     |                    |               |
| 15. สามารถใช้เครื่องมือที่คุ้นเคยภายในบ้าน                                                                                               |                                               |                     |                     |                    |               |
| 16. สามารถเรียนรู้การใช้เครื่องมือ เครื่องใช้ใหม่ๆ ในบ้าน                                                                                |                                               |                     |                     |                    |               |
| 17. สามารถเรียนรู้สิ่งใหม่ ๆ ทั่ว ๆ ไป                                                                                                   |                                               |                     |                     |                    |               |
| 18. สามารถเข้าใจความหมายของคำแปลก ๆ                                                                                                      |                                               |                     |                     |                    |               |
| 19. สามารถเข้าใจบทความในหนังสือพิมพ์หรือนิตยสาร                                                                                          |                                               |                     |                     |                    |               |
| 20. สามารถติดตามเรื่องราวต่างๆ ในวิทยุ หรือโทรทัศน์                                                                                      |                                               |                     |                     |                    |               |
| 21. สามารถติดต่อลูกหลาน ญาติหรือกิจกรรมต่างๆ ไป                                                                                          |                                               |                     |                     |                    |               |
| 22. ความสามารถในการตัดสินใจเรื่องต่าง ๆ ในชีวิตประจำวัน                                                                                  |                                               |                     |                     |                    |               |
| 23. ความสามารถในการใช้จ่าย                                                                                                               |                                               |                     |                     |                    |               |
| 24. ความสามารถในการจัดสรรเรื่องเงิน                                                                                                      |                                               |                     |                     |                    |               |
| 25. สามารถประมาณได้ว่าจะใช้สิ่งของประมาณเท่าไร เช่น จะซื้ออาหารเท่าไร หรือกะเวลาที่ใช้ในการทำกิจกรรมต่างๆ เช่น ใช้เวลาในการเดินทางเท่าไร |                                               |                     |                     |                    |               |
| 26. สามารถที่จะเข้าใจในสิ่งที่เกิดขึ้น พร้อมกับให้เหตุผลในสิ่งนั้นได้                                                                    |                                               |                     |                     |                    |               |
| 27. สามารถร้องเพลงที่เคยร้อง หรือ สวดมนต์ที่เคยสวด                                                                                       |                                               |                     |                     |                    |               |
| 28. สามารถเลือกใช้เครื่องมือเครื่องใช้ต่าง ๆ ได้อย่างเหมาะสมกับงาน                                                                       |                                               |                     |                     |                    |               |
| 29. การพูดจาหรือถามซ้ำๆ                                                                                                                  |                                               |                     |                     |                    |               |
| 30. สามารถปฏิบัติกิจวัตรประจำวันของตนเอง                                                                                                 |                                               |                     |                     |                    |               |
| 31. สามารถเดินทางไป-กลับสถานที่ที่คุ้นเคยได้โดยลำพัง                                                                                     |                                               |                     |                     |                    |               |
| 32. สามารถทำงานที่เคยทำ                                                                                                                  |                                               |                     |                     |                    |               |

Siri S, Okanurak K, Chansirikanjana S, et al. Modified Informant Questionnaire on Cognitive decline in the Elderly (IQCODE) as a screening test for dementia for Thai elderly. *Southeast Asian J Trop Med Public Health* 2006;37:587-94.
